# Supplementary material
Source: PubMed Central journal article supplement (PMC5673118)
Supplement: NIHMS891363-supplement-1.pdf [file NIHMS891363-supplement-1.pdf]

## Supplemental Tables

**Table S11.** Incidence rate (95% CI) and hazard ratios (95% CI) of atrial fibrillation in association with galectin-3 quartiles, ARIC, 1996 – 2013.

| Atrial fibrillation | Galectin-3 (ng/ml)  |                                     |                                     |                                     | P for trend |
|---------------------|---------------------|-------------------------------------|-------------------------------------|-------------------------------------|-------------|
|                     | Q1                  | Q2                                  | Q3                                  | Q4                                  |             |
| Events, n           | 264                 | 289                                 | 253                                 | 379                                 | -           |
| Person-years        | 30522               | 30466                               | 29321                               | 28249                               | -           |
| Incidence rate*     | 8.6<br>(7.7 – 9.8)  | 9.5<br>(8.4 – 10.6)                 | 8.6<br>(7.6 – 9.8)                  | 13.4<br>(12.1 – 14.8)               | -           |
| Model 1             | 1 (Referent)        | 1.08<br>(0.91 – 1.28)               | 1.00<br>(0.84 – 1.19)               | 1.55<br>(1.32 – 1.84)               | < 0.0001    |
| Model 2             | 1 (Referent)        | 1.05<br>(0.89 – 1.24)               | 0.91<br>(0.76 – 1.09)               | 1.24<br>(1.04 – 1.48)               | 0.02        |
| Model 3             | 1 (Referent)        | 1.13<br>(0.95 – 1.35)               | 1.01<br>(0.83 – 1.24)               | 1.42<br>(1.14 – 1.77)               | 0.002       |
| Model 4             | 1 (Referent)        | 1.06<br>(0.88 – 1.26)               | 0.94<br>(0.77 – 1.14)               | 1.23<br>(0.99 – 1.54)               | 0.05        |
| <b>Model 5</b>      | <b>1 (Referent)</b> | <b>1.06</b><br><b>(0.88 – 1.26)</b> | <b>0.93</b><br><b>(0.76 – 1.14)</b> | <b>1.23</b><br><b>(0.99 – 1.54)</b> | <b>0.05</b> |

\*Incidence rate is unadjusted and per 1,000 person-years.

Model 1: adjusted for age (continuous), race (white, black) and sex (female, male).

Model 2: Model 1 plus systolic blood pressure (continuous), blood pressure medications (yes, no), BMI (continuous), height (continuous), diabetes status (yes, no), total cholesterol (continuous), smoking status (current, former, never) and eGFR (continuous).

Model 3: Model 2 plus SNP rs4644 (AA, AC, CC).

Model 4: Model 3 plus ln NT-proBNP (continuous), ln CRP (continuous), and ln TnT (continuous).

**Model 5: Model 4 plus left atrial abnormality (yes, no).**

**Table S112.** Hazard ratios (95% CI) of atrial fibrillation in association with galectin-3 quartiles accounting for incident coronary disease and heart failure as time dependent variables, ARIC, 1996 – 2013.

|                           | Galectin-3 (ng/ml) |                        |                        |                          | P for trend |
|---------------------------|--------------------|------------------------|------------------------|--------------------------|-------------|
|                           | Q1                 | Q2                     | Q3                     | Q4                       |             |
| CHD*, n                   | 155                | 134                    | 153                    | 202                      | -           |
| Heart failure*, n         | 163                | 189                    | 240                    | 343                      | -           |
| Hazard ratio <sup>†</sup> | 1 (Referent)       | 1.056<br>(0.88 – 1.26) | 0.88<br>(0.72 – 1.087) | 1.0910<br>(0.88 – 1.367) | 0.464       |

CHD: coronary heart disease.

\* Events occurred after onset of study but before diagnosis of atrial fibrillation

<sup>†</sup> Adjusting for age (continuous), race (white, black) and sex (female, male), systolic blood pressure (continuous), blood pressure medications (yes, no), BMI (continuous), height (continuous), diabetes status (yes, no), total cholesterol (continuous), smoking status (current, former, never). SNP rs4644 (AA, AC, CC), eGFR (continuous), ln NT-proBNP (continuous), ln CRP (continuous), and ln TnT (continuous), ~~and left atrial abnormality (yes, no).~~

**Table SIII.3.** Race-specific incidence rate (95% CI) and hazard ratios (95% CI) of atrial fibrillation in relation to *LGALS3* rs4644 genotype, ARIC, 1996 – 2013.

| Characteristics              | rs4644 genotype   |                    |                    | P for trend |
|------------------------------|-------------------|--------------------|--------------------|-------------|
|                              | CC                | AC                 | AA                 |             |
| <b>Whites</b>                |                   |                    |                    |             |
| N (%)                        | 2303 (34.6)       | 3209 (48.3)        | 1137 (17.1)        | -           |
| Mean (SD) Galectin-3 (ng/mL) | 16.7 (3.9)        | 13.9 (3.2)         | 11.1 (2.5)         | <0.0001     |
| AF, n                        | 352               | 469                | 196                | -           |
| Incidence rates* (95% CI)    | 10.9 (9.8 – 12.1) | 10.4 (9.5 – 11.4)  | 12.3 (10.7 – 14.2) | -           |
| Model 1                      | 1 (Referent)      | 0.95 (0.82 – 1.09) | 1.10 (0.92 – 1.31) | 0.46        |
| <b>Blacks</b>                |                   |                    |                    |             |
| N (%)                        | 939 (52.6)        | 714 (40.0)         | 134 (7.5)          | -           |
| Mean (SD) Galectin-3 (ng/mL) | 17.3 (7.5)        | 14.2 (3.6)         | 11.6 (3.1)         | <0.0001     |
| AF, n                        | 94                | 63                 | 11                 | -           |
| Incidence rates* (95% CI)    | 7.0 (5.7 – 8.6)   | 6.3 (4.9 – 8.1)    | 5.7 (3.1 – 10.3)   | -           |
| Model 1                      | 1 (Referent)      | 0.88 (0.64 – 1.21) | 0.75 (0.40 – 1.41) | 0.28        |

AF: atrial fibrillation.

\*Unadjusted incidence rates and per 1,000 person-years.

Model 1: adjusted for age (continuous), and sex (female, male) and, in blacks, for 10 principal components of ancestry.
